# Supplementary material
Source: HighWire-hosted journal article supplement (https://jitc.bmj.com/content/8/2/e001535)
Supplement: inline-supplementary-material-5 [file inline-supplementary-material-5.pdf]

Figure S1      Expression of Gal-3 in tumors by immunohistochemistry

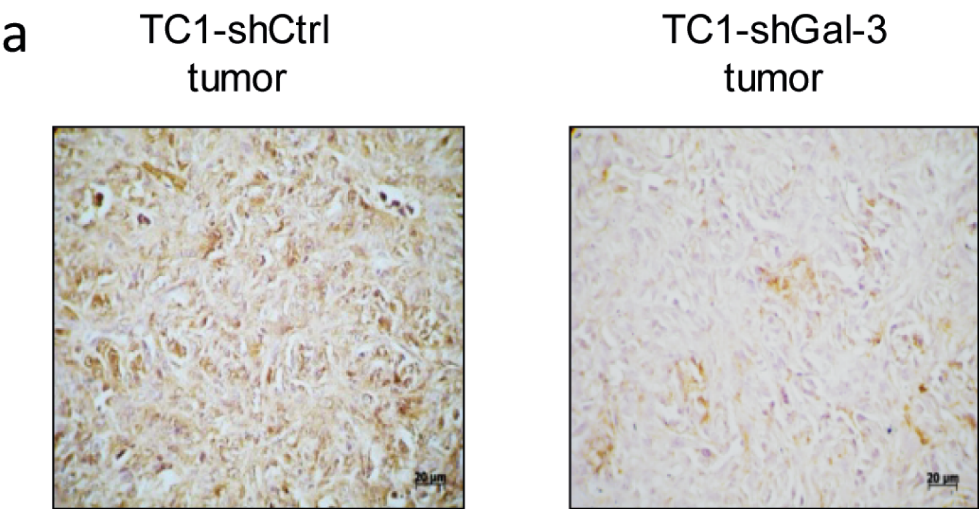

(a) representative image (magnification, X40;  
Bars: 60μm) (n>10), and ( — : 20μm)

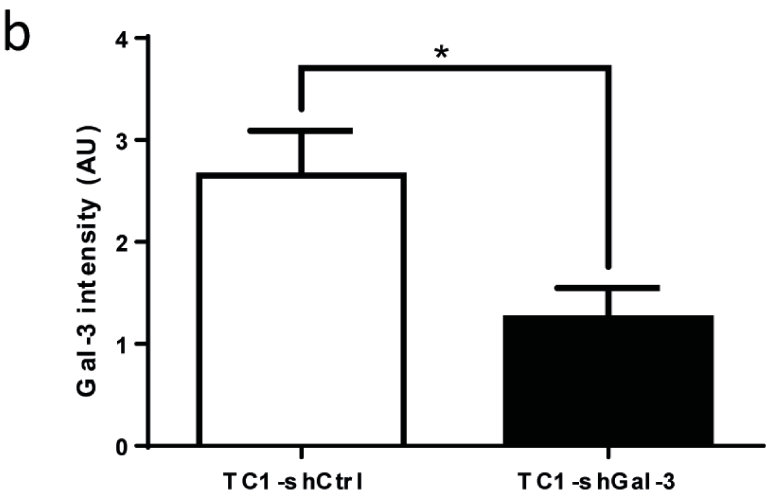

(b) intensity se based on [0: no labeling, 1: low labeling,  
2: medium labeling and 4: high labeling] from 3  
independent evaluators on all tumor samples.
